# Supplementary material
Source: PubMed Central journal article supplement (PMC6613750)
Supplement: JVI.00373-19-s0001.pdf [file JVI.00373-19-s0001.pdf]

## SUPPORTING INFORMATION

**Figure S1:** Gene Ontology (GO) analyses performed using the Gene Ontology Consortium algorithm (<http://www.geneontology.org>) recapitulating the enriched functions found in the pool of escaping mRNAs per condition. The color scale represents the p-value of each GO term as assessed by the algorithm.

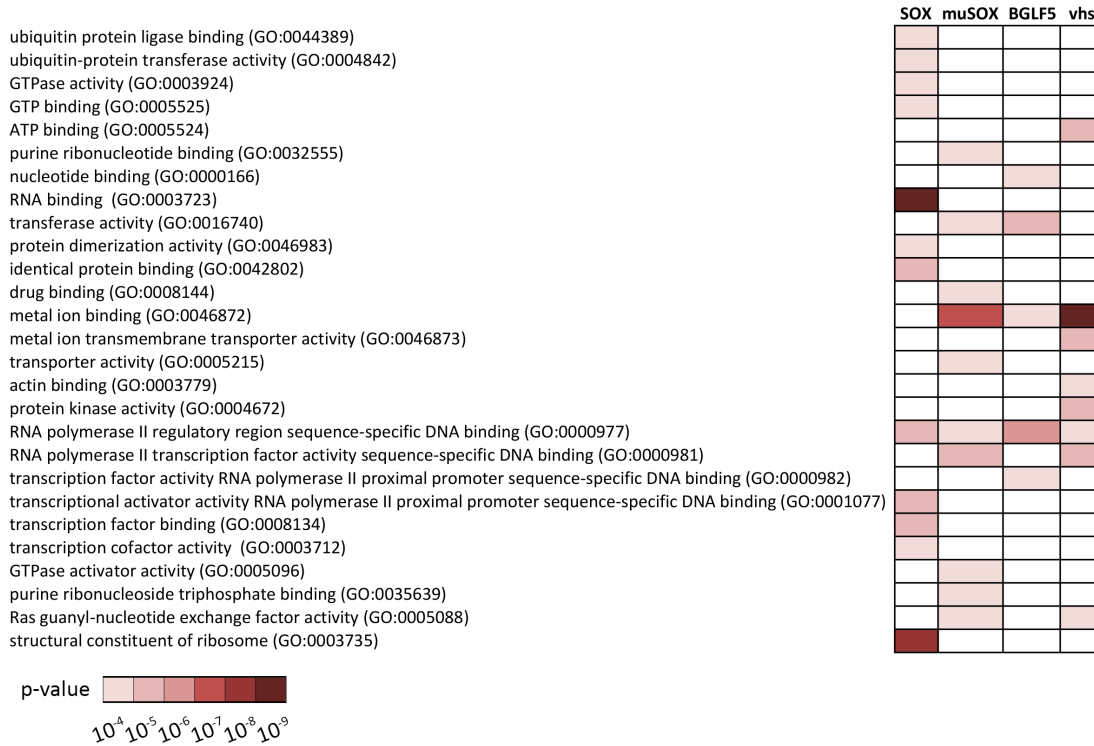

**Figure S2:** Sequence alignment and comparison of structure predictions obtained with RNAfold for C19ORF66 3'UTR with other known SRE transcripts: IL-6 and GADD45B.

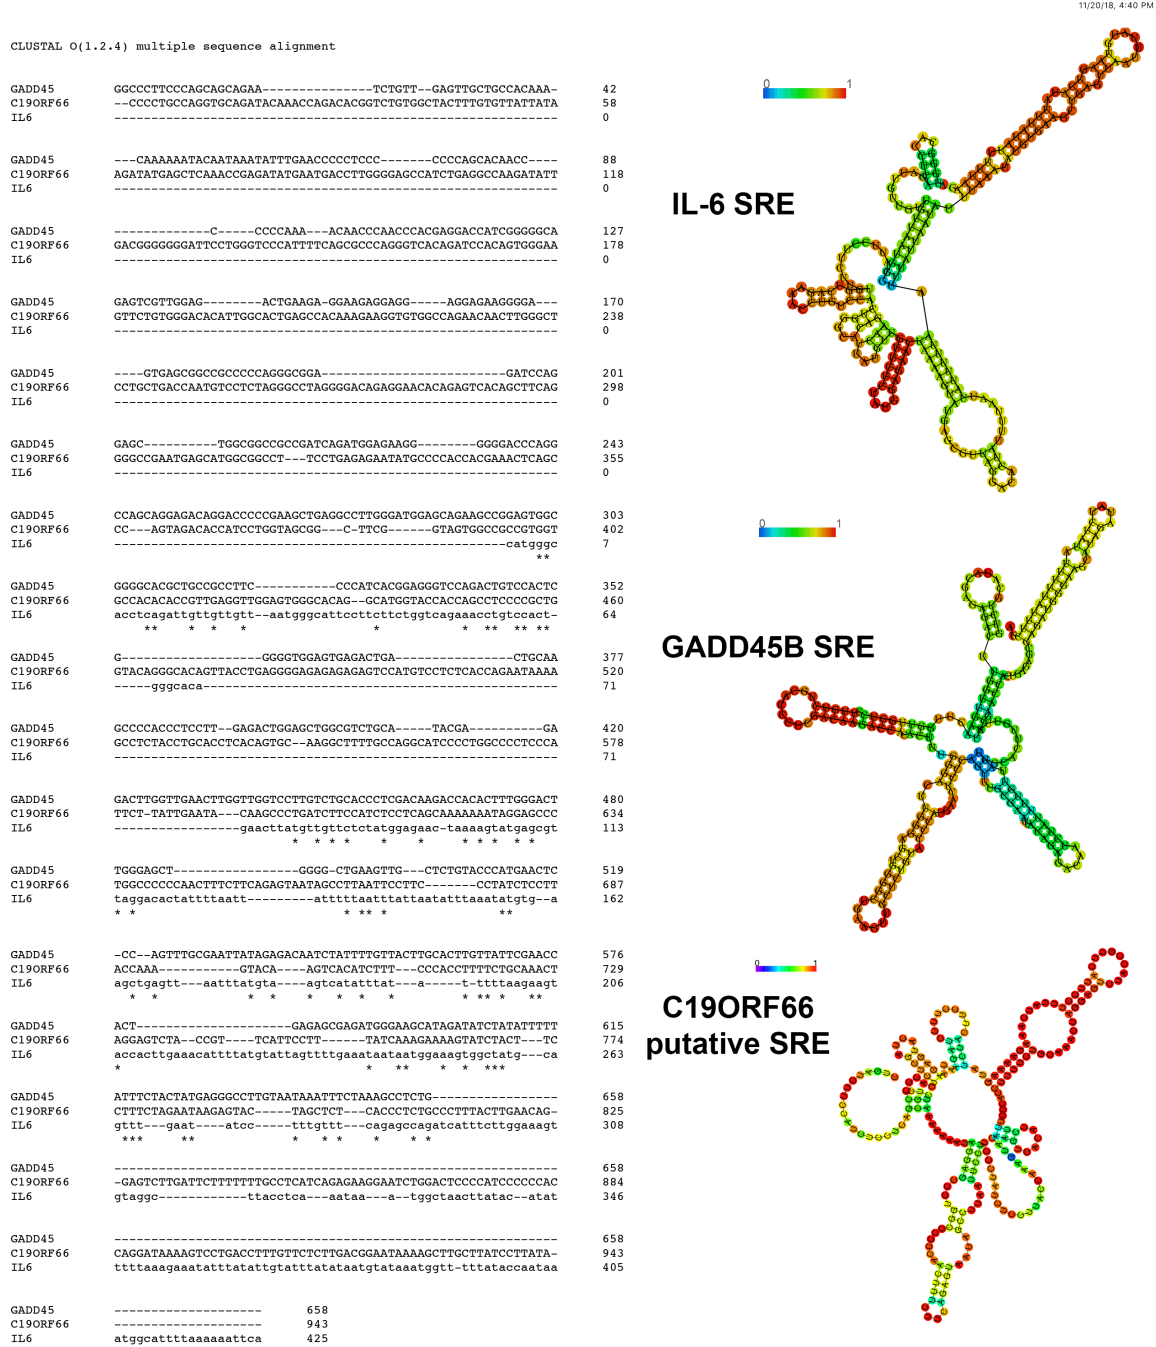

**Table S1:** RNA-seq dataset. Summary table combining transcript ID and FPKM scores per condition (Mock sample, SOX, muSOX, BGLF5 and vhs).

**Table S2:** List of mRNA escaping all endonucleases tested by comparative RNA-seq as identified by hierarchical clustering. Each tab in this table represent the fold change over mock sample for each herpesviral endonuclease. Highlighted in yellow are the transcripts selected as top 10% for further investigation.
